# Supplementary material for: COVID-19 disruption to family medicine residency curriculum: results from a 2020 US programme directors survey
Source: PubMed Central journal article supplement — Fam Med Community Health. 2021 Sep 1;9(3):e001144. doi: 10.1136/fmch-2021-001144 (PMC8413477; doi:10.1136/fmch-2021-001144), 2021-09-01
Supplement: fmch-2021-001144supp001.pdf [file fmch-2021-001144supp001.pdf]

## Appendix A. CERA questions

**Demographic questions** used for our study

Please describe the type of program you direct:

- University-Based
- Community-Based, University-Affiliated
- Community-Based, Non-Affiliated
- Military
- Other (please specify)

What state is your program located?

- New England (NH, MA, ME, VT, RI, or CT)
- Middle Atlantic (NY, PA, or NJ)
- South Atlantic (PR, FL, GA, SC, NC, VA, DC, WV, DE, or MD)
- East South Central (KY, TN, MS, or AL)
- East North Central (WI, MI, OH, IN, or IL)
- West South Central (OK, AR, LA, or TX)
- West North Central (ND, MN, SD, IA, NE, KS, or MO)
- Mountain (MT, ID, WY, NV, UT, AZ, CO, or NM)
- Pacific (WA, OR, CA, AK, or HI)

What is the approximate size of the community in which your program is located?

- Less than 30,000
- 30,000 to 74,999
- 75,000 to 149,000
- 150,000 to 499,999
- 500,000 to 1 million
- More than 1 million

How many residents (total complement) were in your program as of July 2020?

- < 19
- 19 - 31
- > 31

**Our questions**

Please rate disruption to required ACGME curricular experiences for your program during the height of the COVID-19 pandemic.

1=no disruption, 2=mild disruption, 3=moderate disruption, 4=severe disruption and 5=suspended

- Adult medicine
- Family medicine practice site
- Emergency medicine
- Geriatrics
- Gynecology
- ICU
- Musculoskeletal
- Newborn
- Obstetrics
- Pediatrics

Practice management  
Surgery

On a scale 1-10, what is your concern that the disruption in your residents' education during the COVID-19 pandemic will impact your ACGME accreditation?

1=no concern

2

3=little concern

4

5=some concern

6

7=moderate concern

8

9

10=extraordinary concern
